# Supplementary material
Source: Royal Society of Chemistry journal article supplement (doi:10.1039/d5en01195g)
Supplement: d5en01195g1.pdf [file d5en01195g1.pdf]

1

## Supplementary Material

2 **Divergent impacts of antibiotics on ferrihydrite biotransformation by**  
3 ***Shewanella oneidensis*: electron transfer regulation and iron redox**  
4 **cycling**

5 Xinyue Li<sup>1†</sup>, Jianxin Chen<sup>1†</sup>, Xiyuan Chen<sup>1</sup>, Yuxin Wang<sup>1</sup>, Jieyu Li<sup>1</sup>, Xiangchun Guo<sup>1</sup>, Yan Shi<sup>1,2</sup>,  
6 Kejing Zhang<sup>1,2\*</sup>, Zhang Lin<sup>1,2</sup>

7 <sup>1</sup>*School of Metallurgy and Environment, Central South University, Changsha 410083, China*

8 <sup>2</sup>*Chinese National Engineering Research Center for Control & Treatment of Heavy Metal*  
9 *Pollution, Changsha 410083, China*

10 \*Corresponding author. Email: 22022126@csu.edu.cn

11 †These authors contributed equally to this work.

12 Number of pages: 26 (including cover page)

13 Number of tables: 6

14 Number of figures: 13

15

## 16 **Content summary**

### 17 **Supplementary materials and methods**

18 **Table S1.** The concentrations of antibiotics used in this study.

19 **Table S2.** Specific primer sequences for quantitative real-time PCR analysis of Mtr pathway-  
20 associated genes in MR-1.

21 **Table S3.** Mössbauer hyperfine parameters of spectra from Figure 2 measured at room  
22 temperature.

23 **Table S4.** Fe(II) concentrations at 5 h for each treatment group in Figure 4a and significance  
24 analysis.

25 **Table S5.** The fluorescence intensities of peaks in 3D-EEM of EPS fractions excreted by MR-1  
26 incubated with SMX and CAP at 5 h of incubation.

27 **Table S6.** The pseudo-first-order kinetic consumption rates of SMX and CAP.

28 **Figure S1.** Morphology and particle size distribution of synthesized Fh. (a) SEM image and particle  
29 size histogram derived from SEM; (b) particle size distribution determined by dynamic light  
30 scattering.

31 **Figure S2.** Biomass of MR-1 incubated with PCG. CK-neg1: MR-1 cultured without sodium  
32 lactate; CK-neg2: heat-killed MR-1 cells cultured with sodium lactate. The treatment with PCG did  
33 not affect the biomass of MR-1.

34 **Figure S3.** Total Fe(II) production of Fh incubated with SMX or CAP. Fe(II) production of Fh  
35 induced by SMX or CAP alone was negligible.

36 **Figure S4.** XRD spectra of the solids from cultures incubated for 5 h with the addition of various  
37 antibiotics. The dashed lines correspond to the positions of the characteristic peaks of goethite.

38 **Figure S5.** SEM images of solids in cultures incubated for one month with SMX and CAP added.

39 **Figure S6.** SAED pattern of solids from the biotransformation of Fh with CAP after one month of  
40 incubation. The dashed lines correspond to the positions of the characteristic crystal planes of  
41 goethite and magnetite, respectively.

42 **Figure S7.** Biomass of MR-1 incubated with SMX or CAP. CK-neg1: MR-1 cultured without  
43 sodium lactate; CK-neg2: heat-killed MR-1 cells cultured with sodium lactate. Treatments with  
44 SMX or CAP did not affect the biomass of MR-1.

45 **Figure S8.** XRD patterns of solids from Fh incubated with SMX or CAP for one month. Neither  
46 SMX nor CAP is capable of catalyzing the conversion of Fh to magnetite or goethite.

47 **Figure S9.** Total Fe(II) production from Fh pre-equilibrated with antibiotics and subsequently  
48 reduced by MR-1.

49 **Figure S10.** XRD spectra of solids from the one-month biotransformation of Fh pre-  
50 equilibrated with antibiotics.

51 **Figure S11.** Transformation products of CAP (a) and SMX (b) after 10 h of incubation with Fh

52 and MR-1.

53 **Figure S12.** XRD spectra of solids from Fh transformation catalyzed by exogenous aqueous  
54 Fe(II), with and without the addition of SMX, following one-month incubation.

55 **Figure S13.** SEM image and EDS mapping of the solids formed from Fe(II) incubated with  
56 SMX after 5 h of incubation.

57 **References**

58

## 59 **Supplementary materials and methods**

### 60 **Text S1**

61 **Sources of chemicals.** LB broth was purchased from Sangon Biotech. MOPs and  $\text{FeCl}_3 \cdot 6\text{H}_2\text{O}$   
62 were purchased from Aladdin at 99.0% purity and analytical grade, respectively. Penicillin G  
63 Sodium (PCG) was purchased from Solarbio at 95% purity. Lincomycin (LCM), acetonitrile, and  
64 methanol were all purchased from Sigma-Aldrich at 99.5%, 99.9%, and 99.9% purity, respectively.  
65 Other reagents used (e.g. NaCl, L-sodium lactate, sodium fumarate, sulfamethoxazole (SMX),  
66 ciprofloxacin (CIP), erythromycin (ERY), tetracycline (TC), and chloramphenicol (CAP), etc.)  
67 were all purchased from Macklin at analytical grade. All solutions were prepared using Milli-Q  
68 ultrapure water. Furthermore, to facilitate the dissolution process, hydrochloric acid and acetic acid  
69 were added to dissolve SMX and CIP, respectively. Ethanol served as the solubilizing agent for  
70 ERY, TC, and CAP.

### 71 **Text S2**

72 **Synthesis of ferrihydrite (Fh).** Fh was synthesized by following a previous study.<sup>1</sup> In brief, a  
73 solution of 0.4 M  $\text{FeCl}_3 \cdot 6\text{H}_2\text{O}$  was mixed with a 1 M NaOH solution on a magnetic stirrer for a  
74 duration of 3 h, until the pH reached a range of 7.0 to 8.0. Subsequently, the suspension was allowed  
75 to react for an additional 6 h. To purify the suspension, ultrapure water was added to remove the  
76 supernatant, and this process was repeated at least 5 times until the residual chloride concentration  
77 was reduced to below 1 mM. The resultant purified Fh slurry was resuspended in ultrapure water  
78 and stored in a refrigerator at 4°C until needed. The concentrations of Fe(III) and Fe(II) ions were  
79 then determined using a spectrophotometric method, as described in a later section. The scanning  
80 electron microscopy (SEM, MIRA3 LMH, Czech Republic) and particle size analyzer (Brookhaven  
81 Instruments Co, NanoBrook Omni, USA) were used to characterize the particle size distribution of  
82 synthesized Fh.

### 83 **Text S3**

84 **Measurement of Fe(II) concentration.** To characterize the reduction degree of Fh, a modified  
85 *o*-phenanthroline spectrophotometric method was adopted to quantify Fe(II) concentration.<sup>2</sup>  
86 Initially, 2 mL of the suspension was collected and completely dissolved in 6 M hydrochloric acid  
87 (HCl). A specific volume of the aforementioned acidized solution was mixed into 0.5 mL of acetate  
88 buffer (prepared by dissolving 400 g of ammonium acetate and 500 mL of ice acetic acid per liter,  
89 adjust to pH 4.5). Subsequently, 0.2 mL of 0.5 wt% *o*-phenanthroline solution was added, and the  
90 mixture solution was diluted with ultrapure water to a final volume of 5 mL. The absorbance was  
91 measured at 510 nm by UV-vis UV-1780 spectrophotometers, after chromogenic reaction for 15  
92 min. To determine the total iron ( $\text{Fe}_{\text{total}}$ ) concentration, aliquots of the aforementioned acidized  
93 solution were mixed with 1 mL of 10 wt% hydroxylamine hydrochloride solution to fully reduce  
94 Fe(III) ions to Fe(II) ions. The total Fe(II) concentration (equal to  $\text{Fe}_{\text{total}}$ ) was then determined using  
95 the *o*-phenanthroline spectrophotometric method. Subsequently, the Fe(III) concentration was  
96 calculated by subtracting the Fe(II) concentration from the  $\text{Fe}_{\text{total}}$  concentration.

97 **Text S4**

98 **Determination of concentrations and byproducts for SMX and CAP.** At each sampling  
99 time, 2 mL of the suspensions were collected from the incubations and filtered through a 0.22  $\mu\text{m}$   
100 nylon filter. Subsequently, the filtrate samples were filtered using a sodium type cation exchange  
101 resin filter (IC-Na 1cc) to remove iron, after which the concentrations of SMX and CAP, along with  
102 product determination, were conducted. Concentrations of SMX and CAP were measured using  
103 ultra performance liquid chromatography with photo-diode array detection (UPLC-PDA;  
104 ACQUITY H-class).<sup>3, 4</sup> The stationary phase was a ACQUITY UPLC® BEH C18 (1.7  $\mu\text{m}$ , 2.1  
105 mm  $\times$  50 mm). The mobile phase flowed at a rate of 0.1 mL min<sup>-1</sup>, with an injection volume of 10  
106  $\mu\text{L}$ . SMX and CAP were detected at wavelengths of 268 nm and 278 nm, respectively. For SMX  
107 concentration analysis, an isocratic mobile phase composed of 80% aqueous buffer (20 mM  
108 phosphate buffer adjusted to pH 3.0) and 20% acetonitrile (v/v) was used. In addition, CAP  
109 concentration analysis utilized a mobile phase containing 40% water (0.1% formic acid) and 60%  
110 methyl alcohol (v/v).

111 Furthermore, the degradation products of SMX and CAP were determined using a liquid  
112 chromatography system (Agilent 1290uplc) coupled with a quadrupole time-of-flight mass  
113 spectrometer (Agilent qtof6550), equipped with an electrospray ion (ESI) source.<sup>3, 4</sup> The stationary  
114 phase for this analysis was ACQUITY UPLC® BEH C18 (1.7  $\mu\text{m}$ , 2.1 mm  $\times$  100 mm). The mobile  
115 phase flowed at a rate of 0.3 mL min<sup>-1</sup>, with a sample size of 5  $\mu\text{L}$ . To test the byproducts of SMX,  
116 mobile phases A (0.1% formic acid) and B (acetonitrile) were used. The elution gradient began with  
117 100% phase A for 4 min, followed by a transition to 90% phase A and 10% phase B within 2 min.  
118 Then, it was converted to 60% of phase A and 35% of phase B within 4 min, kept for 3 min, and  
119 finally switched back to 100% phase A within 1 min, which was maintained for 1 min. For CAP  
120 byproducts, mobile phases A (0.1% formic acid) and B (methanol) were used, with a 50% elution  
121 ratio of phase A and 50% phase B, retention time of 15 min. The mass charge ratio (m/z) of MS  
122 analysis was 50~1000, with a sheath temperature of 350°C, a sheath gas flow of 12 L min<sup>-1</sup>, a voltage  
123 of 4000 V in ESI<sup>+</sup> mode, and 3200 V in ESI-mode.

124 **Text S5**

125 **Extraction of extracellular polymeric substance (EPS).** The heating method was used  
126 according to a previously reported procedure.<sup>5</sup> Initially, 20 mL of the reaction suspension  
127 (containing cells) was collected and washed with PBS (0.1 M, pH=7.0). Subsequently, the cells  
128 were dispersed in 10 mL of 0.05% (wt%) NaCl solution. The suspension was then heated in a water  
129 bath for 30 min at 70°C, centrifuged at 8000 g for 15 min, and the supernatant was regarded as the  
130 extracted EPS.

131 **Text S6**

132 **Electrochemical analyses.** Differential pulse voltammetry (DPV) was performed by an  
133 electrochemical workstation (Multi Autolab M204, Metrohm, Switzerland).<sup>6</sup> A conventional quartz  
134 three-electrode electrochemical cell was used for all electrochemical experiments with glassy

135 carbon electrode (GCE), platinum wire, and Ag/AgCl (sat. KCl) as working, counter, and reference  
136 electrodes, respectively. For the determination of the extracellular electron transfer type of MR-1,  
137 5  $\mu$ L of bacterial droplets, washed twice with PBS (100 mM, pH=7.0), were absorbed onto the  
138 surface of the GCE. After drying, 2  $\mu$ L 5% Nafion dispersion was applied to form a film on the  
139 surface. The electrolyte, containing 30 mM MOPS (pH=7.0) and 25 mM KCl, was deaerated by  
140 bubbling with N<sub>2</sub> for more than 45 min. The DPV parameters were set as follows: E<sub>i</sub> = -0.6 V; E<sub>f</sub> =  
141 0.4 V; amplitude, 60 mV; pulse width, 200 ms; and potential increment, 6 mV.

142 **Tables**

143 **Table S1.** The concentrations of antibiotics used in this study.

| Antibiotic species | Working concentration (µg/mL) | Antibiotic concentration per unit of bacteria in this system (µg/cells) | Environmental concentration (µg/kg) <sup>7, 8</sup> |          | Location           | Antibiotic concentration per unit of bacteria in environment (µg/cells) |
|--------------------|-------------------------------|-------------------------------------------------------------------------|-----------------------------------------------------|----------|--------------------|-------------------------------------------------------------------------|
|                    |                               |                                                                         | min                                                 | max      |                    |                                                                         |
| SMX                | 100.00                        | $2 \times 10^{-6}$                                                      | 1.80                                                | 6207.60  | Animal farm manure | $2.00 \times 10^{-12}$ - $8.87 \times 10^{-3}$                          |
| CIP                | 100.00                        | $2 \times 10^{-6}$                                                      | 1.50                                                | 10111.10 | Animal farm manure | $1.67 \times 10^{-12}$ - $1.44 \times 10^{-2}$                          |
| ERY                | 100.00                        | $2 \times 10^{-6}$                                                      | 4.20                                                | 91.00    | Animal farm manure | $4.67 \times 10^{-12}$ - $1.30 \times 10^{-4}$                          |
| PCG                | 100.00                        | $2 \times 10^{-6}$                                                      | 0.01                                                | 974.00   | sediment           | $1.11 \times 10^{-14}$ - $1.39 \times 10^{-3}$                          |
| TC                 | 50.00                         | $1 \times 10^{-6}$                                                      | 4.50                                                | 9260.00  | Animal farm manure | $5.00 \times 10^{-12}$ - $1.32 \times 10^{-2}$                          |
| LCM                | 50.00                         | $1 \times 10^{-6}$                                                      | 164.00                                              | 17000.00 | Animal farm manure | $1.82 \times 10^{-10}$ - $2.43 \times 10^{-2}$                          |
| CAP                | 25.00                         | $5 \times 10^{-7}$                                                      | 42.20                                               | 42.20    | Animal farm manure | $4.69 \times 10^{-11}$ - $6.03 \times 10^{-5}$                          |

144 Given that in natural environments, there are  $10^3$ ~ $10^7$  microorganisms in 1 g of soil,<sup>9</sup> and soil bacteria account for 70%~90% of the total number of soil  
 145 microorganisms, the bacteria count in the environment can be estimated to be the range of  $7 \times 10^2$  to  $9 \times 10^8$  cells g<sup>-1</sup>.

146 **Table S2.** Specific primer sequences for quantitative real-time PCR analysis of Mtr pathway-  
 147 associated genes in MR-1.

| Gene ID    | Description | Primers                                                                                              |
|------------|-------------|------------------------------------------------------------------------------------------------------|
|            | 16sDNA      | Forward sequence (5'-3'): CCCTGGACAAAGACTGACGC<br>Reverse sequence (5'-3'): AGACACCAAACCTCCGAGTAGACA |
| SO_RS08155 | OmcA        | Forward sequence (5'-3'): AAGGTGGCGAGCGTCATAC<br>Reverse sequence (5'-3'): CACAATCTGCGGCTGGTTT       |
| SO_RS21330 | CymA        | Forward sequence (5'-3'): GATTGGTGTGTGGGCTATTTT<br>Reverse sequence (5'-3'): GATGCCAGCACTTCATTCTTC   |
| SO_RS08145 | Mtr A       | Forward sequence (5'-3'): CGTATGTCTTGGAATGGCG<br>Reverse sequence (5'-3'): TGAGTGGGTGACTTGAGCGT      |
| SO_RS08140 | Mtr B       | Forward sequence (5'-3'): TTA CTGGCAACCGCCTTCT<br>Reverse sequence (5'-3'): CTGCACCGACCACATCTACC     |
| SO_RS08150 | Mtr C       | Forward sequence (5'-3'): CGATTTTGCTGCGGGTAA<br>Reverse sequence (5'-3'): TGAACACTAATTGTGGCTGCTT     |
| SO_1782    | Mtr D       | Forward sequence (5'-3'): ATCCCAACATCAAAGATTCCC<br>Reverse sequence (5'-3'): GTTGCCTTTCCAAGCGATAC    |
| SO_1781    | Mtr E       | Forward sequence (5'-3'): CGGACTTACCCACGTTTCTTA<br>Reverse sequence (5'-3'): TACTGCCCGCTTGATCTGA     |
| SO_1780    | Mtr F       | Forward sequence (5'-3'): AAGCATCAGCAGTGCCAGTAT<br>Reverse sequence (5'-3'): GTTCCCCAGTTAGCATAAATCC  |

148

149 **Table S3.** Mössbauer hyperfine parameters of spectra from Figure 2 measured at room temperature.

| Sample                                    | Attribution       | $\delta$ (mm/s) | $\Delta$ or $\epsilon$ (mm/s) | HF (T) | RA (%) |
|-------------------------------------------|-------------------|-----------------|-------------------------------|--------|--------|
| Initial Fh substrates                     |                   |                 |                               |        |        |
| Fh                                        | Fh                | 0.27            | 0.75                          | —      | 100    |
| Biotic transformation products in 5 h     |                   |                 |                               |        |        |
| CK                                        | Goethite          | 0.27            | 0.51                          | —      | 10.5   |
|                                           | Fh                | 0.26            | 0.79                          | —      | 89.5   |
| SMX<br>added                              | Goethite          | 0.24            | 0.52                          | —      | 24.7   |
|                                           | Fh                | 0.24            | 0.84                          | —      | 75.3   |
| CAP<br>added                              | Goethite          | 0.27            | 0.53                          | —      | 24.0   |
|                                           | Fh                | 0.26            | 0.85                          | —      | 76.0   |
| Biotic transformation products in 1 month |                   |                 |                               |        |        |
| CK                                        | Magnetite (tetra) | 0.11            | -0.19                         | 48.38  | 38.4   |
|                                           | Magnetite (octa)  | 0.63            | 0.25                          | 47.68  | 33.7   |
|                                           | Goethite          | 0.34            | -0.07                         | 31.40  | 21.2   |
|                                           | Fh                | 0.34            | 2.28                          | —      | 6.7    |
| SMX<br>added                              | Magnetite (tetra) | 0.04            | -0.26                         | 48.33  | 38.6   |
|                                           | Magnetite (octa)  | 0.51            | 0.23                          | 47.74  | 36.3   |
|                                           | Goethite          | 0.02            | 0.25                          | 29.68  | 18.3   |
|                                           | Fh                | 0.39            | 2.09                          | —      | 6.7    |
| CAP<br>added                              | Magnetite (tetra) | 0.19            | -0.21                         | 49.46  | 2.8    |
|                                           | Magnetite (octa)  | 0.43            | 0.21                          | 46.76  | 16.2   |
|                                           | Goethite          | 0.24            | -0.08                         | 30.38  | 54.6   |
|                                           | Fh                | 0.23            | 0.76                          | —      | 26.4   |

150  $\delta$ , isomer shift taking  $\alpha$ -iron as reference at room temperature;  $\Delta$  or  $\epsilon$ , quadrupole splitting; HF,  
 151 hyperfine magnetic field; RA, relative abundance; tetra, tetrahedral site; octa, octahedral site.

152 **Table S4.** Fe(II) concentrations at 5 h for each treatment group in Figure 4a and significance  
 153 analysis.

| Treatment group             | Fe(II) concentration (mM) | Significance vs. CK | Significance vs. Corresponding Direct Treatment Group |
|-----------------------------|---------------------------|---------------------|-------------------------------------------------------|
| CK                          | 0.81 ± 0.07               | -                   | -                                                     |
| MR-1 + SMX + Fh             | 1.70 ± 0.04               | P < 0.01 (**)       | -                                                     |
| pre-equilibrated MR-1 + SMX | 1.00 ± 0.13               | P > 0.05 (ns)       | P < 0.01 (**) (vs. MR-1 + SMX + Fh)                   |
| MR-1 + CAP + Fh             | 0.36 ± 0.06               | P < 0.01 (**)       | -                                                     |
| pre-equilibrated MR-1 + CAP | 0.31 ± 0.02               | P < 0.01 (**)       | P > 0.05 (ns) (vs. MR-1 + CAP + Fh)                   |

154 All data are expressed as mean ± standard deviation. Statistical analysis was performed using one-  
 155 way ANOVA followed by a pairwise test. Significance levels are marked as follows: \*\*P < 0.01  
 156 (extremely significant difference), \*P < 0.05 (significant difference), ns (no significant difference,  
 157 P > 0.05).

158 **Table S5.** The fluorescence intensities of peaks in 3D-EEM of EPS fractions excreted by MR-1  
159 incubated with SMX and CAP at 5 h of incubation.

|     | Peak A        |                   | Peak B        |                   | Peak C        |                   |
|-----|---------------|-------------------|---------------|-------------------|---------------|-------------------|
|     | Ex/Em<br>(nm) | Intensity<br>(AU) | Ex/Em<br>(nm) | Intensity<br>(AU) | Ex/Em<br>(nm) | Intensity<br>(AU) |
| CK  | 285/335       | 46.38             | 365/445       | 48.13             | 445/520       | 90.79             |
| SMX | 290/340       | 77.87             | 360/450       | 47.17             | 445/520       | 87.95             |
| CAP | 290/340       | 28.19             | -             | -                 | 445/520       | 75.78             |

160

161 **Table S6.** The pseudo-first-order kinetic consumption rates of SMX and CAP.

|     | Pseudo-first-order kinetic consumption rates of antibiotics ( $\text{h}^{-1}$ ) |                 |                        |
|-----|---------------------------------------------------------------------------------|-----------------|------------------------|
|     | antibiotic + MR-1                                                               | antibiotic + Fh | antibiotic + MR-1 + Fh |
| SMX | 0.001                                                                           | 0.001           | 1.41                   |
| CAP | 0.063                                                                           | 0.0008          | 0.91                   |

162

163 **Figures**

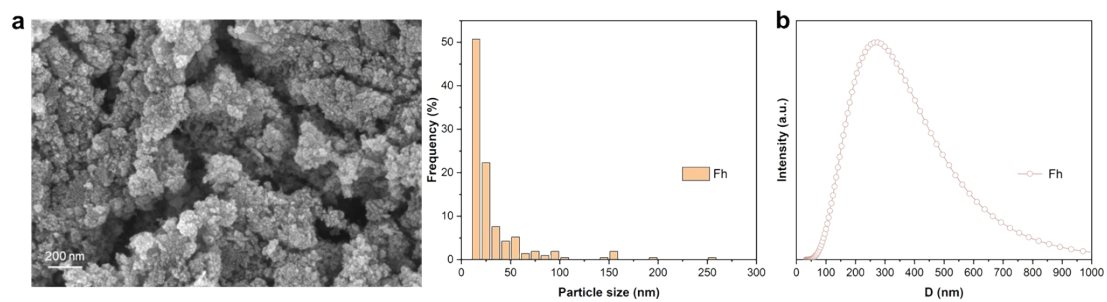

164

165 **Figure S1.** Morphology and particle size distribution of synthesized Fh. (a) SEM image and particle  
166 size histogram derived from SEM; (b) particle size distribution determined by dynamic light  
167 scattering.

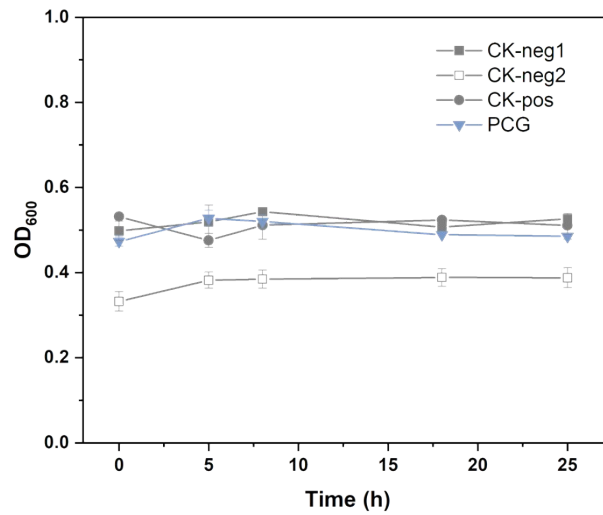

168

169 **Figure S2.** Biomass of MR-1 incubated with PCG. CK-neg1: MR-1 cultured without sodium  
 170 lactate; CK-neg2: heat-killed MR-1 cells cultured with sodium lactate. The treatment with PCG did  
 171 not affect the biomass of MR-1.

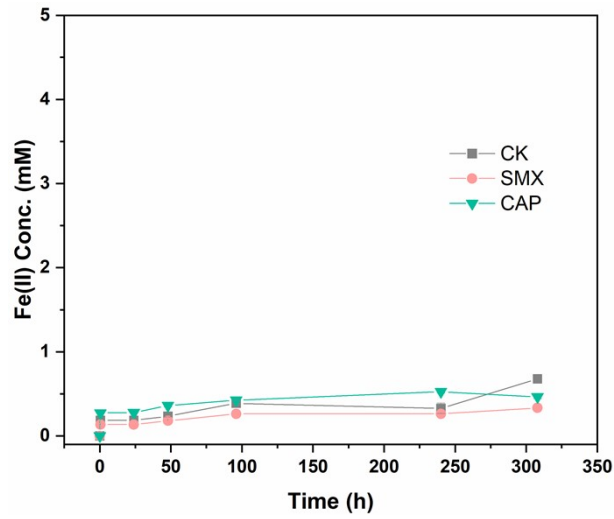

172

173 **Figure S3.** Total Fe(II) production of Fh incubated with SMX or CAP. Fe(II) production of Fh  
174 induced by SMX or CAP alone was negligible.

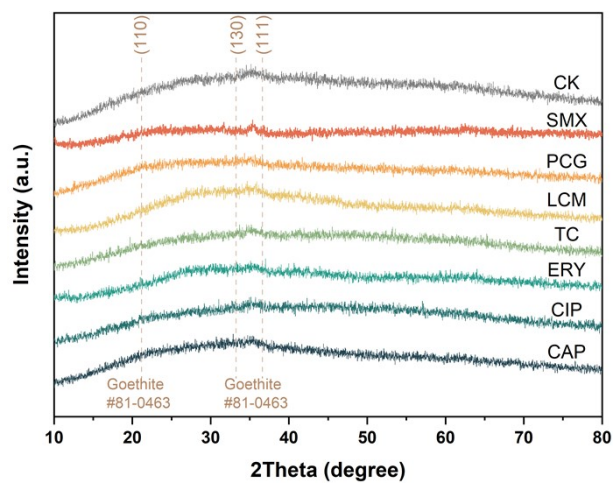

175

176 **Figure S4.** XRD spectra of the solids from cultures incubated for 5 h with the addition of various  
177 antibiotics. The dashed lines correspond to the positions of the characteristic peaks of goethite.

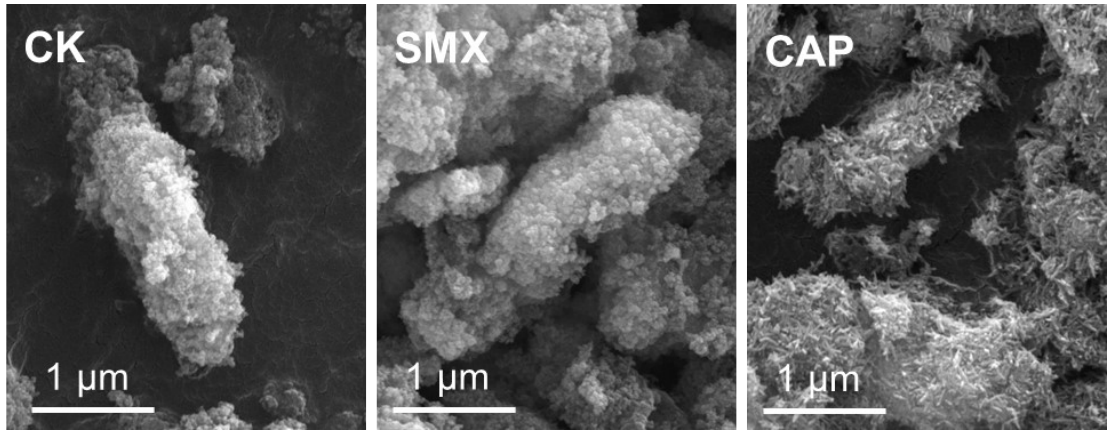

178

179 **Figure S5.** SEM images of solids in cultures incubated for one month with SMX and CAP added.

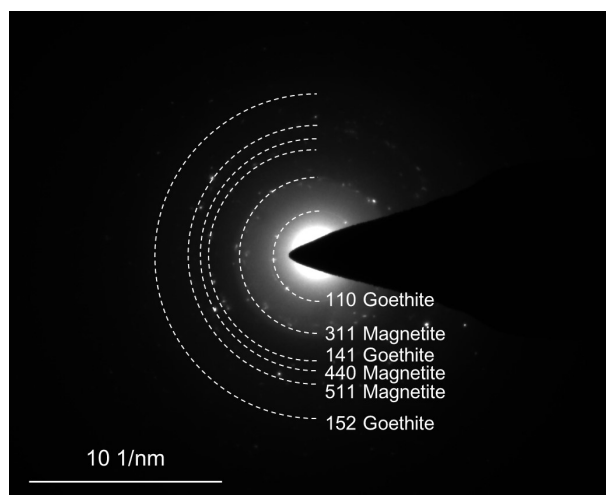

180

181 **Figure S6.** SAED pattern of solids from the biotransformation of Fh with CAP after one month of  
182 incubation. The dashed lines correspond to the positions of the characteristic crystal planes of  
183 goethite and magnetite, respectively.

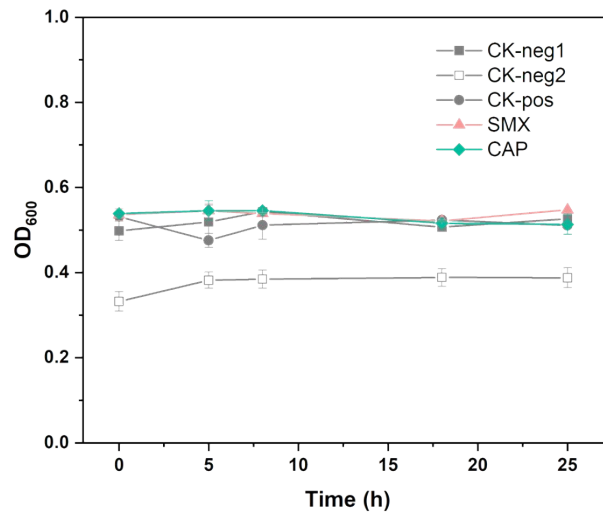

184

185 **Figure S7.** Biomass of MR-1 incubated with SMX or CAP. CK-neg1: MR-1 cultured without  
 186 sodium lactate; CK-neg2: heat-killed MR-1 cells cultured with sodium lactate. Treatments with  
 187 SMX or CAP did not affect the biomass of MR-1.

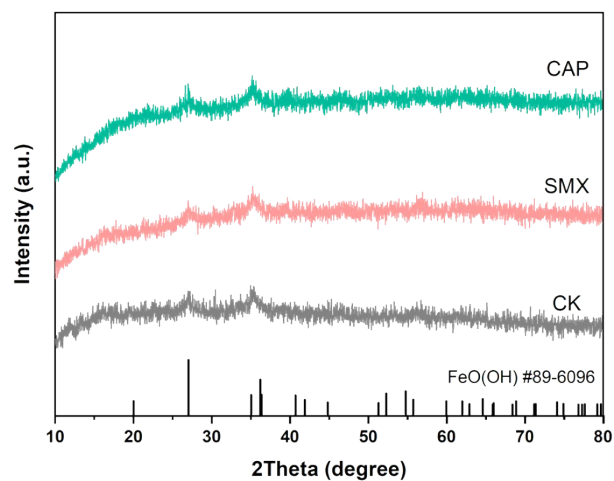

188

189 **Figure S8.** XRD patterns of solids from Fh incubated with SMX or CAP for one month. Neither

190 SMX nor CAP is capable of catalyzing the conversion of Fh to magnetite or goethite.

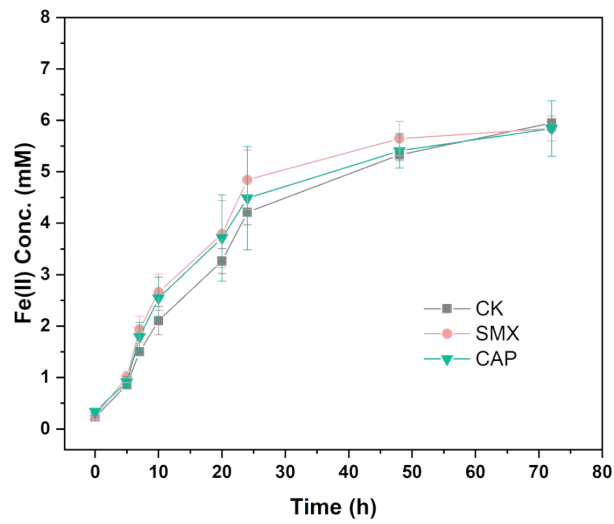

191

192 **Figure S9.** Total Fe(II) production from Fh pre-equilibrated with antibiotics and subsequently  
193 reduced by MR-1.

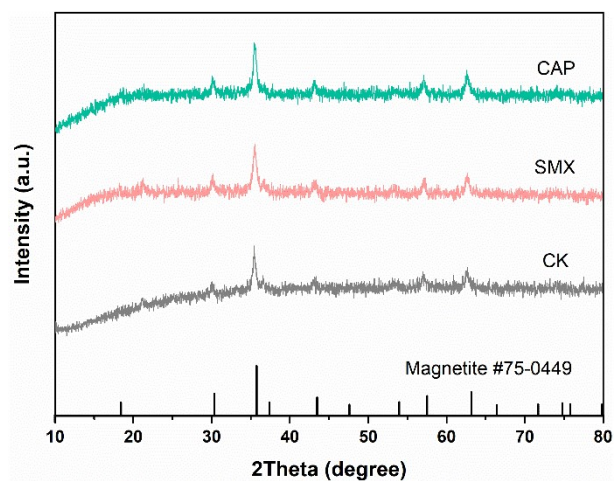

194

195 **Figure S10.** XRD spectra of solids from the one-month biotransformation of Fh pre-equilibrated  
196 with antibiotics.

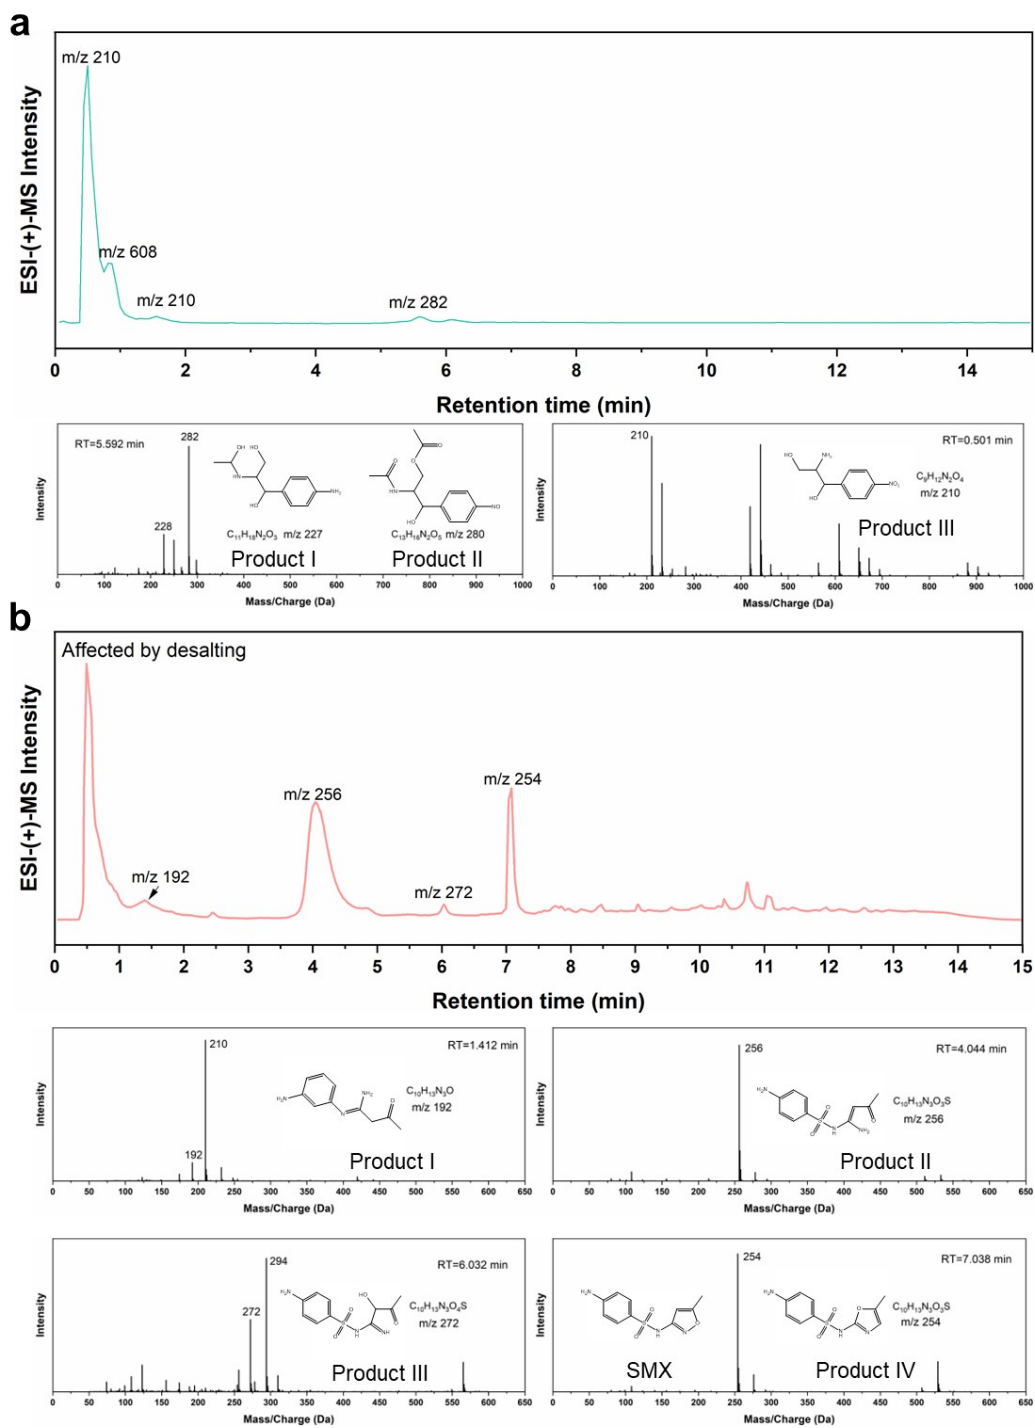

198

199 **Figure S11.** Transformation products of CAP (a) and SMX (b) after 10 h of incubation with Fh  
 200 and MR-1.

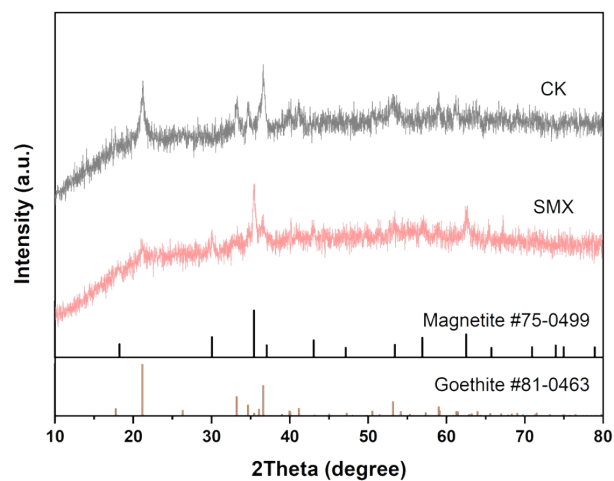

201

202 **Figure S12.** XRD spectra of solids from Fh transformation catalyzed by exogenous aqueous Fe(II),

203 with and without the addition of SMX, following one-month incubation.

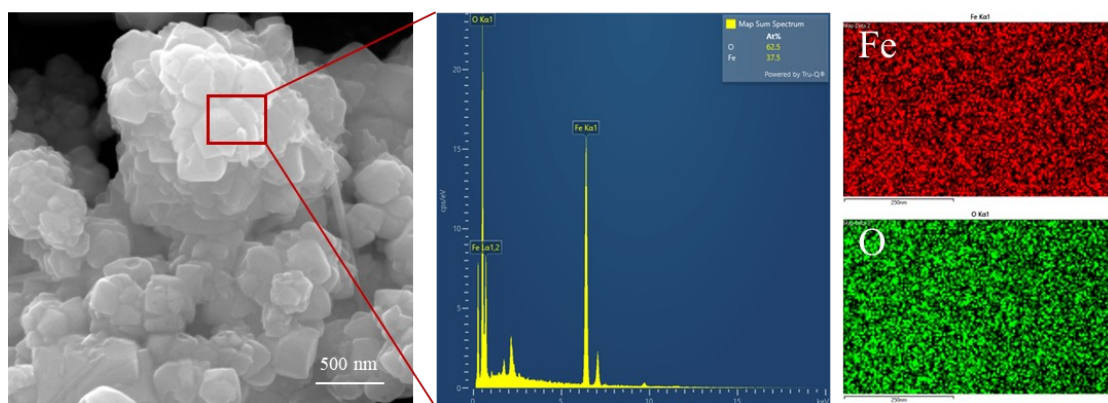

204  
 205 **Figure S13.** SEM image and EDS mapping of the solids formed from Fe(II) incubated with SMX  
 206 after 5 h of incubation.

## 207 References

208

209 1. U. Schwertmann and R. M. Cornell, *Iron oxides in the laboratory: preparation and*  
210 *characterization*, John Wiley & Sons, 2008.

211 2. F. Zhu, Y. Huang, H. Ni, J. Tang, Q. Zhu, Z.-e. Long and L. Zou, Biogenic iron sulfide  
212 functioning as electron-mediating interface to accelerate dissimilatory ferrihydrite reduction by  
213 *Shewanella oneidensis* MR-1, *Chemosphere*, 2022, **288**, 132661.

214 3. J. L. Mohatt, L. Hu, K. T. Finneran and T. J. Strathmann, Microbially mediated abiotic  
215 transformation of the antimicrobial agent sulfamethoxazole under iron-reducing soil conditions,  
216 *Environ. Sci. Technol.*, 2011, **45**, 4793-4801.

217 4. D. Wu, S. Huang, X. Zhang, H. Ren, X. Jin and C. Gu, Iron minerals mediated interfacial  
218 hydrolysis of chloramphenicol antibiotic under limited moisture conditions, *Environ. Sci.*  
219 *Technol.*, 2021, **55**, 9569-9578.

220 5. W. Yan, W. Guo, L. Wang and C. Jing, Extracellular polymeric substances from *Shewanella*  
221 *oneidensis* MR-1 biofilms mediate the transformation of ferrihydrite, *Sci. Total Environ.*, 2021,  
222 **784**, 147245.

223 6. Y. Xiao, E. Zhang, J. Zhang, Y. Dai, Z. Yang, H. E. Christensen, J. Ulstrup and F. Zhao,  
224 Extracellular polymeric substances are transient media for microbial extracellular electron  
225 transfer, *Sci. Adv.*, 2017, **3**, e1700623.

226 7. F. Huang, Z. An, M. J. Moran and F. Liu, Recognition of typical antibiotic residues in  
227 environmental media related to groundwater in China (2009–2019), *J. Hazard. Mater.*, 2020,  
228 **399**, 122813.

229 8. C. Chemtai, F. O. Kengara and A. N. Ngigi, Levels and ecological risk of pharmaceuticals in  
230 River Sosiani, Kenya, *Environ. Monit. Assess.*, 2023, **195**, 431.

231 9. D. Yu and J. Li, *Wei sheng wu xue [Microbiology]*, Science Press, 2nd edn., 1985.

232
